# Supplementary material
Source: publisher figshare collection journal article supplement (https://acs.figshare.com/ndownloader/files/12420086)
Supplement: Supplementary file 1 [file 12420086]

**Supporting Information:**

# Single Molybdenum Atom Anchored on N-Doped Carbon as a Promising Electrocatalyst for Nitrogen Reduction into Ammonia at Ambient Conditions

*Chongyi Ling,<sup>1,2</sup> Xiaowan Bai,<sup>1</sup> Yixin Ouyang,<sup>1</sup> Aijun Du,<sup>\*,2</sup> Jinlan Wang<sup>\*,1</sup>*

<sup>1</sup>School of Physics, Southeast University, Nanjing 211189, People's Republic of China

<sup>2</sup>School of Chemistry, Physics and Mechanical Engineering, Science and Engineering Faculty, Queensland University of Technology, Gardens Point Campus, Brisbane, QLD 4001, Australia

E-mail: [jlwang@seu.edu.cn](mailto:jlwang@seu.edu.cn) (J.W.); [aijun.du@qut.edu.au](mailto:aijun.du@qut.edu.au) (A.D)

## Figures

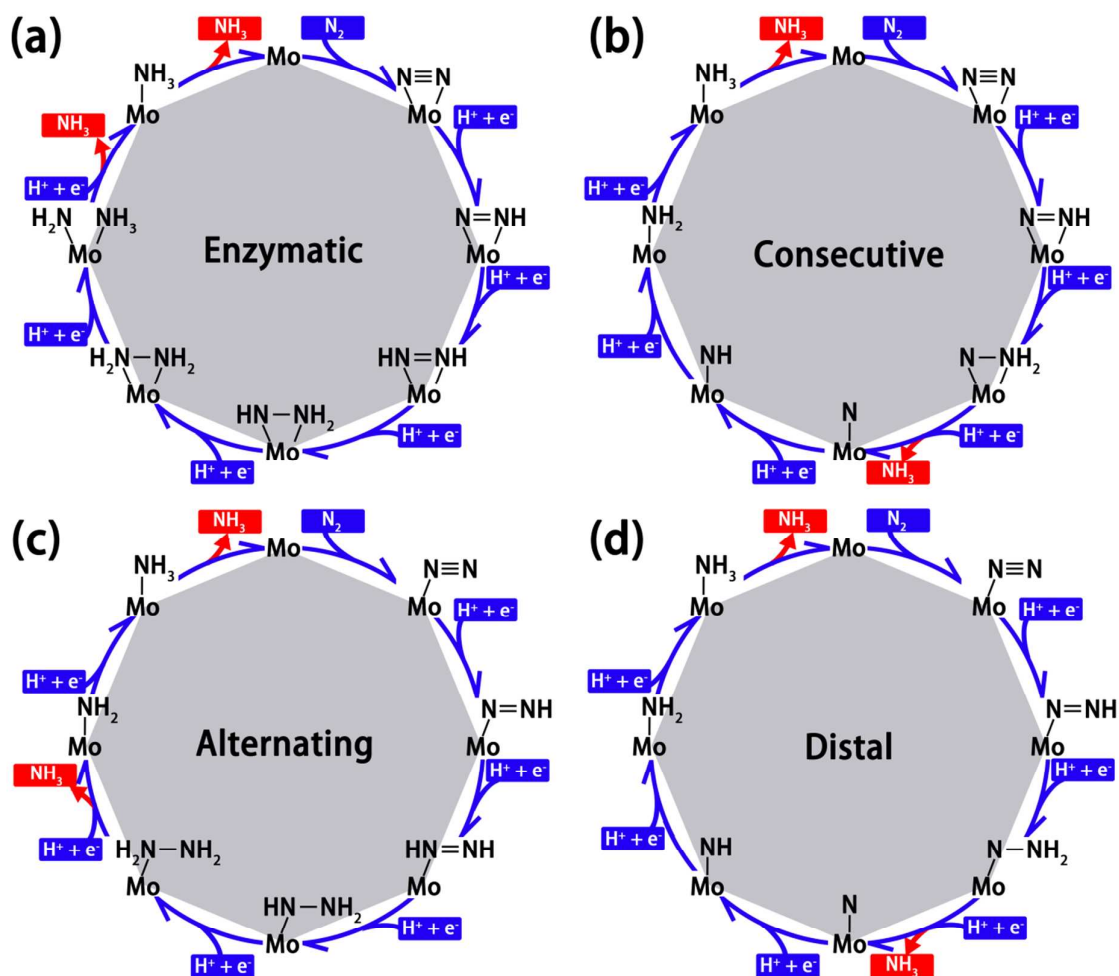

**Figure S1.** Schematic depiction of (a) enzymatic, (b) consecutive, (c) alternating and (d) distal mechanisms for  $\text{N}_2$  reduction to  $\text{NH}_3$  on  $\text{Mo}_1\text{-N}_1\text{C}_2$ .

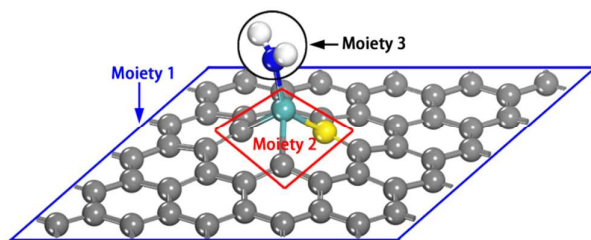

**Figure S2.** Definition of three moieties of  $\text{N}_x\text{H}_y$  adsorbed  $\text{Mo}_1\text{-N}_1\text{C}_2$  by using  $\text{NH}_2$  as prototype.

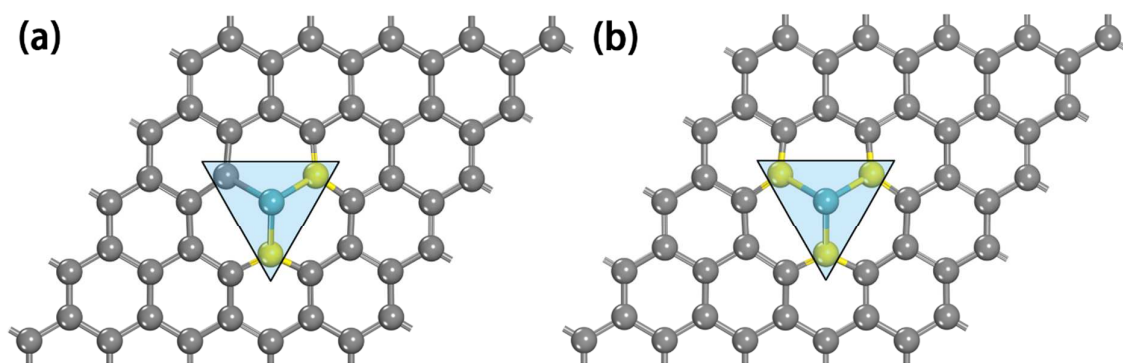

**Figure S3.** Structures of (a) Mo-N<sub>2</sub>C<sub>1</sub> and (b) Mo-N<sub>3</sub> active centers. Gray, cyan and yellow balls represent the C, Mo and N atoms, respectively.

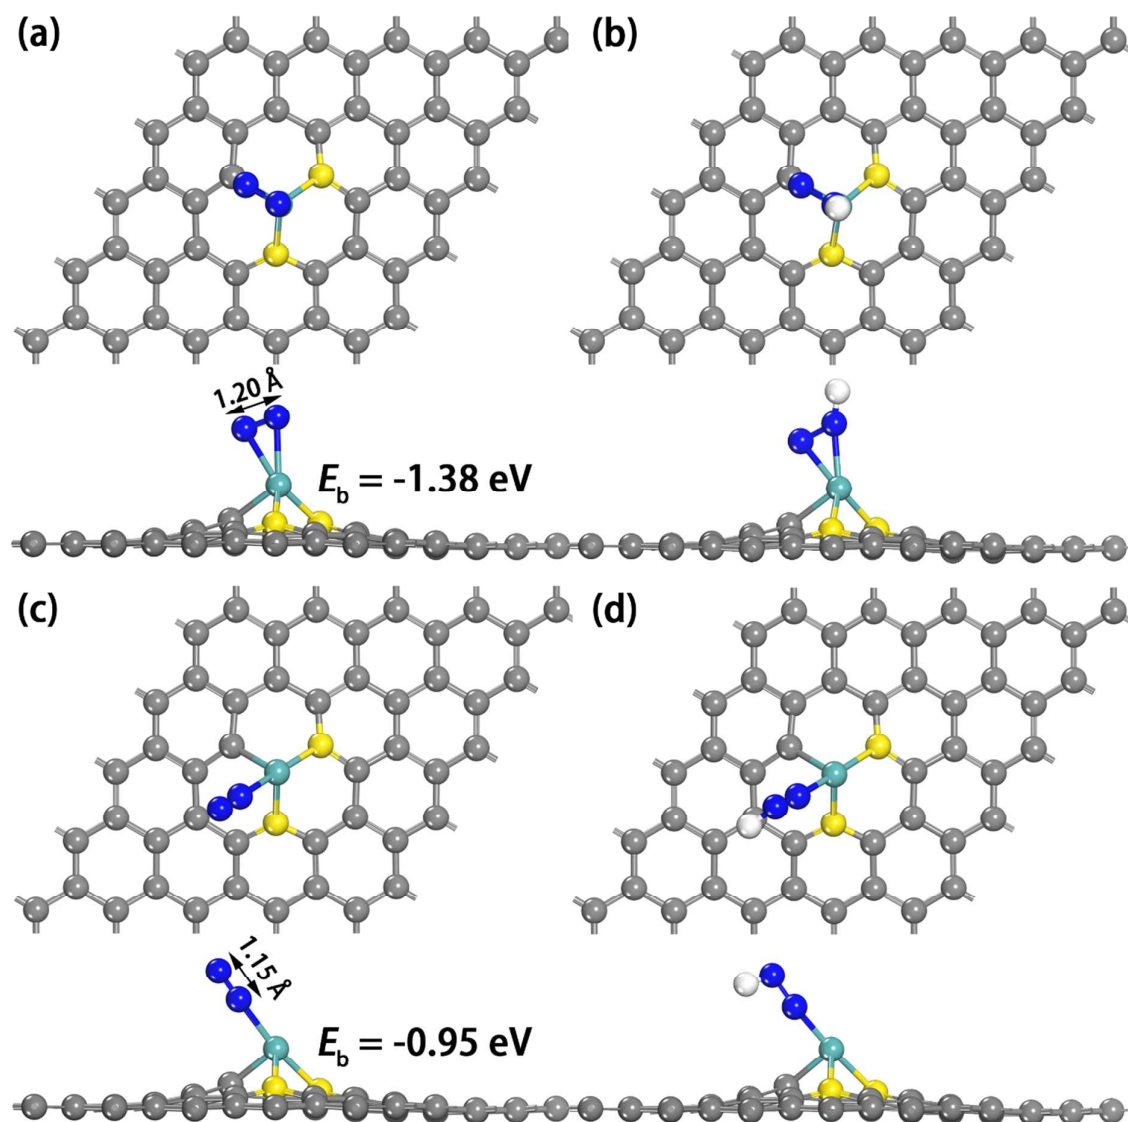

**Figure S4.** Top and side views of the adsorption of N<sub>2</sub> and N<sub>2</sub>H via the (a, b) side-on and (c, d)

end-on patterns on the Mo-N<sub>2</sub>C<sub>1</sub> site. Gray, cyan, yellow and blue balls represent the C, Mo, doped N and adsorbed N atoms, respectively.

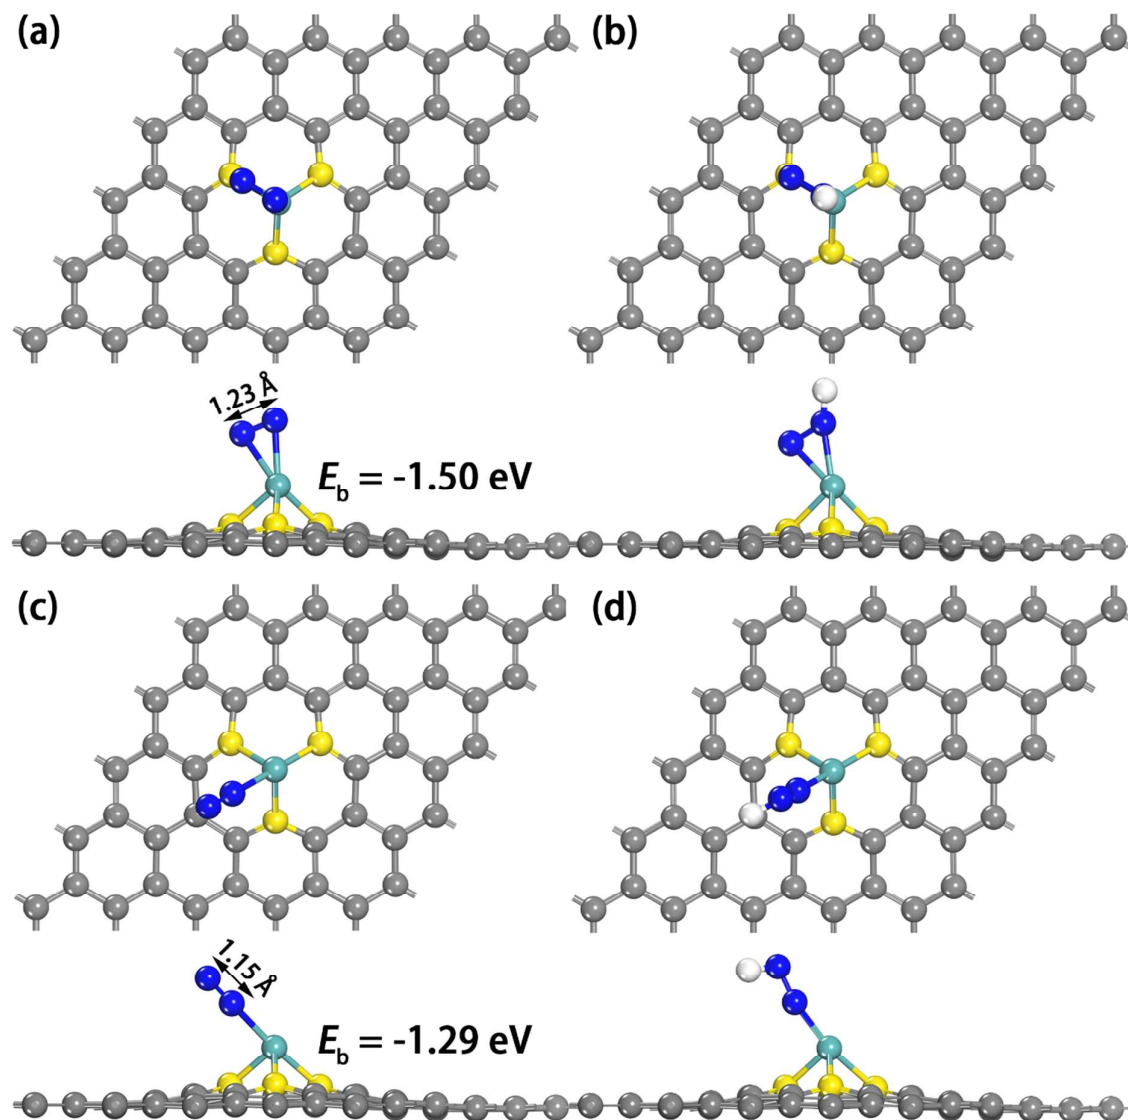

**Figure S5.** Top and side views of the adsorption N<sub>2</sub> and N<sub>2</sub>H via the (a, b) side-on and (c, d) end-on patterns on the Mo-N<sub>3</sub>. Gray, cyan, yellow and blue balls represent the C, Mo, doped N and adsorbed N atoms, respectively.

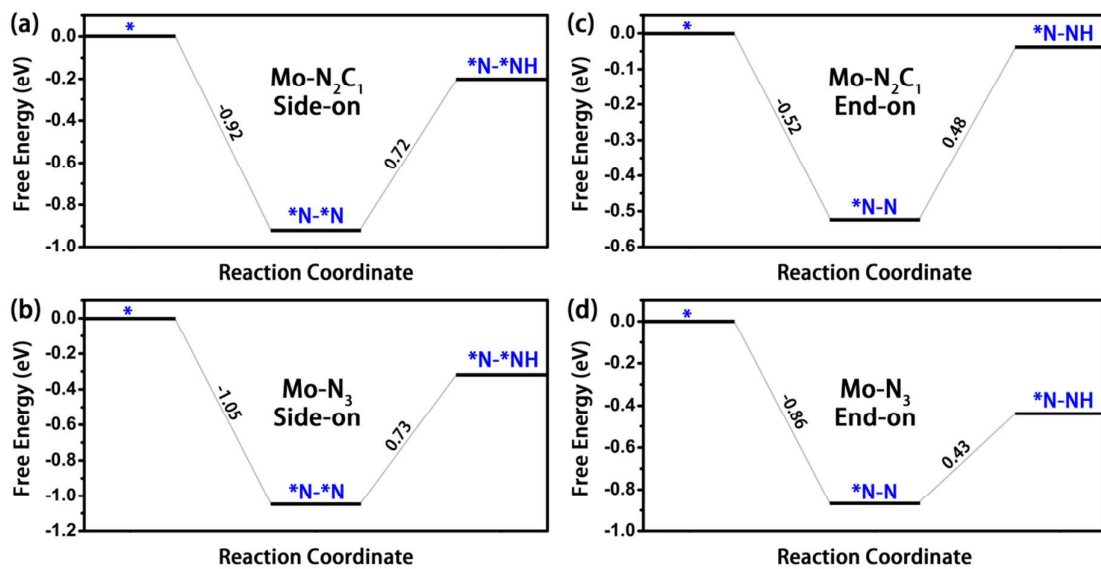

**Figure S6.** Calculated free energy diagrams for  $N_2$  adsorption and protonation of side-on adsorbed  $N_2$  on (a) Mo- $N_2C_1$  and (b) Mo- $N_3$  sites as well as of end-on adsorbed  $N_2$  on (c) Mo- $N_2C_1$  and (d) Mo- $N_3$  sites Mo<sub>1</sub>/N-C.

## Tables

**Table S1.** Calculated zero point energies and entropy of different adsorption species, where the \* denotes the adsorption site. Therefore,  $*N\equiv N$  and  $*N\equiv N$  represent the side-on and end-on adsorption configurations, respectively.

| Adsorption Species | $E_{ZPE}$ (eV) | $TS$ (eV) |
|--------------------|----------------|-----------|
| $N_2$              | 0.15           | 0.58      |
| $*N\equiv N$       | 0.19           | 0.15      |
| $*N=NH$            | 0.49           | 0.13      |
| $*NH=NH$           | 0.79           | 0.16      |
| $*NH-*NH_2$        | 1.14           | 0.17      |
| $*NH_2-*NH_2$      | 1.34           | 0.22      |
| $*NH_2-*NH_3$      | 1.66           | 0.30      |
| $*N-*NH_2$         | 0.83           | 0.15      |
| $*N$               | 0.08           | 0.06      |
| $*NH$              | 0.35           | 0.09      |
| $*NH_2$            | 0.65           | 0.14      |
| $*NH_3$            | 1.02           | 0.16      |
| $*N\equiv N$       | 0.20           | 0.18      |
| $*N=NH$            | 0.49           | 0.16      |
| $*NH=NH$           | 0.80           | 0.24      |
| $*NH-NH_2$         | 1.13           | 0.19      |
| $*NH_2-NH_2$       | 1.49           | 0.25      |
| $*N-NH_2$          | 0.82           | 0.18      |
| $NH_3$             | 0.58           | 0.56      |

**Table S2.** Calculated adsorption energies of  $N_2$  on various SACs that have been synthesized. For  $Cu_1/N-C$ ,  $Pd_1/N-C$  and  $Pt_1/N-C$ , only the end-on configurations can be gained.

| SACs       | Adsorption Energies of $N_2$ (eV) |        |
|------------|-----------------------------------|--------|
|            | Side-on                           | End-on |
| $Mo_1/N-C$ | -1.19                             | -1.18  |
| $Cu_1/N-C$ |                                   | -0.58  |
| $Pd_1/N-C$ |                                   | -0.58  |
| $Pt_1/N-C$ |                                   | -0.40  |
